# Supplementary material
Source: PubMed Central journal article supplement (PMC11072582)
Supplement: 18_2022_4679_MOESM1_ESM.pdf [file 18_2022_4679_MOESM1_ESM.pdf]

# **HSP70-binding motifs function as protein quality control degrons**

## **Supplemental Material**

|                                                                                      |      |
|--------------------------------------------------------------------------------------|------|
| <b>Supplemental Figure S1</b> , Effect of chaperones and co-chaperones               | p. 2 |
| <b>Supplemental Figure S2</b> , Circular dichroism spectroscopy of selected peptides | p. 3 |
| <b>Supplemental Table S1</b> , DNA primers used in this study                        | p. 4 |

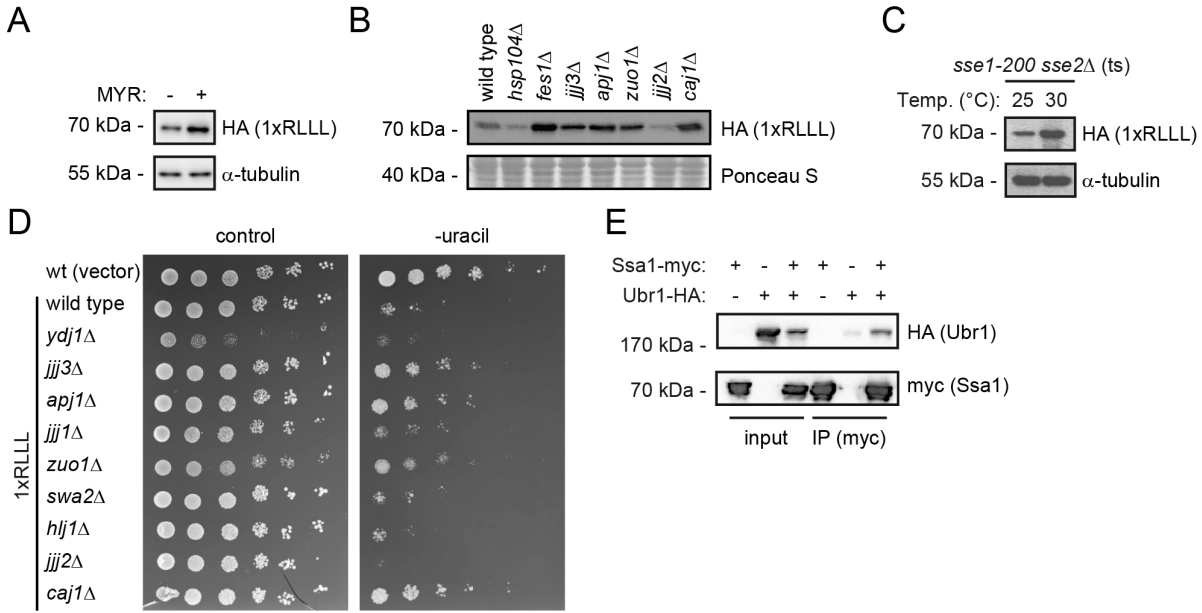

**Supplementary Figure S1** *Effect of chaperones and co-chaperones.* (A) The protein levels of the RLLL degron from cells treated (+) or untreated (-) with the Hsp70-inhibitor myricetin (MYR) for 16 hours were compared by SDS-PAGE and blotting against the HA-tag on the reporter. Tubulin served as loading control. (B) The protein levels of the RLLL degron were compared in the indicated yeast strains by SDS-PAGE and blotting for the HA-tag on the reporter. A Ponceau S staining of the membrane is included as loading control. (C) Protein levels in the temperature-sensitive (ts) Hsp110-double mutant strain (*sse1-200sse2 $\Delta$* ) at 25  $^{\circ}$ C and 30  $^{\circ}$ C were compared by blotting against the HA-tag. Tubulin served as loading control. (D) The dependence of co-chaperones for targeting the RLLL degron was analyzed by growth assays on solid media using the indicated null mutants. Wild-type cells transformed with the reporter vector alone were included for comparison. (E) Wild-type yeast cells expressing myc-tagged Ssa1 and/or HA-tagged Ubr1, as indicated, were used for immunoprecipitation (IP) with myc-trap resin. The precipitated material was analyzed by SDS-PAGE and western blotting using antibodies to myc and HA.

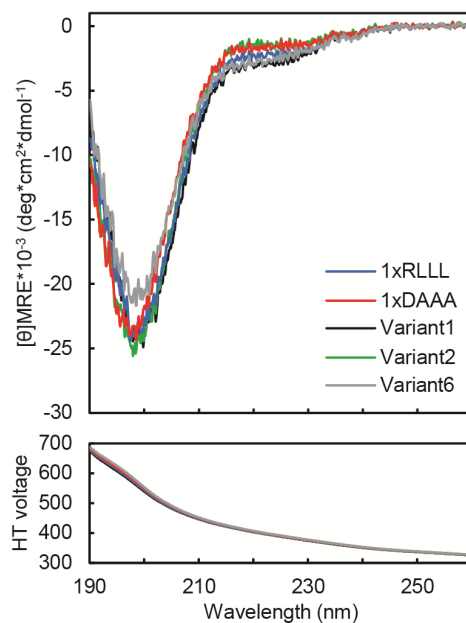

**Supplementary Figure S2** *Circular dichroism spectroscopy of selected peptides.* The secondary structure of selected variants was analyzed by far-UV circular dichroism (CD) spectroscopy. The top panel shows molar ellipticity and the lower panel shows HT voltage.

**Supplementary Table S1**  
*DNA primers used in this study*

| <b>Name</b>             | <b>Sequence</b>                                                                                                | <b>Purpose</b>                                                                                                 |
|-------------------------|----------------------------------------------------------------------------------------------------------------|----------------------------------------------------------------------------------------------------------------|
| F1<br>_LEU2_1119_<br>fw | GCTGGTGATTATAATACCATT<br>TAGGTGGGTTGG                                                                          | Forward fragment 1 containing URA3-GFP<br>for library construction                                             |
| F1_degron_ta<br>g_18_rv | TGATTGTAACAATGCACAGG<br>ATCCTTCGTC                                                                             | Reverse fragment 1 containing URA3-GFP<br>for library construction                                             |
| F2_degron_ta<br>g_fw    | GACGAAGGATCCTGTGCATT<br>GTTACAATCA<br>/iTriMix20//iTriMix20//iTriMix20/<br>/iTriMix20/<br>TCAGCACCAAGAAGAGCTGC | Forward fragment 2 containing a degron tag<br>including four trimer 20 codon mixes for<br>library construction |
| F2_rv                   | ATTACGCCAAGCTCGAAATT<br>AACCC                                                                                  | Reverse fragment 2 containing a degron tag<br>for library construction                                         |
| F3_fw                   | AGTGAGGGTTAATTCGAGC<br>TTGGC                                                                                   | Forward fragment 3 containing origin of<br>replication for library construction                                |
| F3_LEU2_73<br>5_rv      | CCAACCCACCTAAATGGTAT<br>TATAATCACC                                                                             | Reverse fragment 3 containing origin of<br>replication for library construction                                |
| Illumina_adap<br>ter_fw | TCGTCGGCAGCGTCAGATGT<br>GTATAAGAGACAG<br>cctacgatcgacgaagg                                                     | Forward containing degron tag for library<br>sequencing                                                        |
| Illumina_adap<br>ter_rv | GTCTCGTGGGCTCGGAGATG<br>TGTATAAGAGACAG<br>tgtggaattgtgagcggata                                                 | Reverse containing degron tag for library<br>sequencing                                                        |
| VV48                    | GGGTGCTGATCCAGGTGTAC                                                                                           | qPCR HSPA1A/B forward                                                                                          |
| VV49                    | GTCGAAGGTCACCTCGATCT<br>G                                                                                      | qPCR HSPA1A/B reverse                                                                                          |
| VV52                    | GGCCAGGTCATCACCATTGG                                                                                           | qPCR ACTB forward                                                                                              |
| VV53                    | CGGATGTCCACGTCACACTTC                                                                                          | qPCR ACTB reverse                                                                                              |
